# Supplementary material
Source: publisher figshare collection journal article supplement (https://sage.figshare.com/ndownloader/files/15651647)
Supplement: Supplementary file 1 [file 15651647]

## Sheet: Appendix 2
Appendix 2
ICU Revenue code list
Revenue center code	Description of revenue center code
200	General classification for intensive care unit (ICU)
201	Surgical ICU
202	Medical ICU
203	Pediatric ICU
204	Psychiatric ICU
206	Intermediate ICU
207	Burn care
208	Trauma care
209	Other intensive care
210	General classification cardiac care unit (CCU)
211	Myocardial infarction care
212	Pulmonary care
213	Heart transplant
214	Intermediate CCU
219	Other coronary care
